# Supplementary material
Source: publisher figshare collection journal article supplement (https://karger.figshare.com/ndownloader/files/35904416)
Supplement: Supplementary file 1 [file 35904416]

Supplementary information

Table 1

Differences in oxytocin levels by sex, within diagnostic groups.

|  | **Sex** | **M** | **SD** | ***t*** | **df** | ***p*** |
| --- | --- | --- | --- | --- | --- | --- |
| **bvFTD** | **F** | 140.52 | 55.61 | -1.802 | 28 | .082 |
|  | **M** | 237.56 | 172.41 |  |  |  |
| **AD** | **F** | 183.36 | 77.76 | 0.679 | 32 | .502 |
|  | **M** | 160.54 | 101.07 |  |  |  |
| **SD** | **F** | 239.73 | 122.91 | 0.563 | 26 | .580 |
|  | **M** | 199.59 | 164.60 |  |  |  |
| **Controls** | **F** | 197.18 | 64.14 | 1.506 | 22 | .146 |
|  | **M** | 150.61 | 84.94 |  |  |  |

Table 2

Bootstrapped correlations between plasma oxytocin levels and behaviour across groups, with 95% bias-corrected (BCa) confidence intervals.

|  |  | ***N*** | ***r*** | ***p*** | **BCa95LowerCI** | **BCa95upperCI** |
| --- | --- | --- | --- | --- | --- | --- |
| **CBI Motivation** | **bvFTD** | 30 | .173 | .180 | -.175 | .484 |
|  | **SD** | 28 | -.137 | .252 | -.538 | .210 |
|  | **AD** | 33 | -.065 | .360 | -.365 | .212 |
|  |  |  |  |  |  |  |
| **CBI Abnormal Behaviour** | **bvFTD** | 30 | -.241 | .099 | -.465 | -.041 |
|  | **SD** | 28 | -.081 | .344 | -.497 | .365 |
|  | **AD** | 33 | -.131 | .234 | -.463 | .120 |
|  |  |  |  |  |  |  |
| **CBI Mood** | **bvFTD** | 30 | .100 | .301 | -.349 | .451 |
|  | **SD** | 28 | -.048 | .407 | -.317 | .342 |
|  | **AD** | 33 | .035 | .424 | -.397 | .402 |
|  |  |  |  |  |  |  |
| **NPI Disinhibition** | **bvFTD** | 30 | .004 | .492 | -.340 | .330 |
|  | **SD** | 28 | -.128 | .262 | -.444 | .271 |
|  | **AD** | 33 | .006 | .486 | -.483 | 0.462 |
|  |  |  |  |  |  |  |
| **NPI Apathy** | **bvFTD** | 30 | .169 | .186 | -.137 | .433 |
|  | **SD** | 28 | -.144 | .236 | -.509 | .223 |
|  | **AD** | 33 | -.057 | .375 | -.446 | .364 |

*Note.* Values are: Abbreviations: bvFTD = behavioural-variant frontotemporal dementia, AD = Alzheimer’s disease, SD = semantic dementia, CBI = Cambridge Behavioural Inventory, NPI = Neuropsychiatric Inventory. Missing data: 1x AD
